# Supplementary material for: Non-canonical functions of SNAIL drive context-specific cancer progression
Source: PubMed Central journal article supplement (PMC9992512; doi:10.1038/s41467-023-36505-0), 2023-03-07
Supplement: 41467_2023_36505_MOESM1_ESM.pdf [file 41467_2023_36505_MOESM1_ESM.pdf]

## **Non-canonical functions of SNAIL drive context-specific cancer progression**

Mariel C. Paul<sup>1,2#</sup>, Christian Schneeweis<sup>1-4#</sup>, Chiara Falcomatà<sup>1-3#</sup>, Chuan Shan<sup>1,2#</sup>, Daniel Rossmeis<sup>1-3</sup>, Stella Koutsouli<sup>5</sup>, Christine Klement<sup>3,6,7</sup>, Magdalena Zukowska<sup>1-3</sup>, Sebastian A. Widholz<sup>3,6,7</sup>, Moritz Jesinghaus<sup>1-3,8,9</sup>, Konstanze K. Heuermann<sup>1-3</sup>, Thomas Engleitner<sup>3,6,7</sup>, Barbara Seidler<sup>1-3</sup>, Katia Sleiman<sup>1-3</sup>, Katja Steiger<sup>8</sup>, Markus Tschurtschenthaler<sup>1-3</sup>, Benjamin Walter<sup>4</sup>, Sören A. Weidemann<sup>1-3</sup>, Regina Pietsch<sup>1-3</sup>, Angelika Schnieke<sup>10</sup>, Roland M. Schmid<sup>4</sup>, Maria S. Robles<sup>5</sup>, Geoffroy Andrieux<sup>11,12</sup>, Melanie Boerries<sup>11,12</sup>, Roland Rad<sup>3,6,7</sup>, Günter Schneider<sup>1-3,13</sup> and Dieter Saur<sup>1-4\*</sup>

## **Supplementary Figures S1-S6**

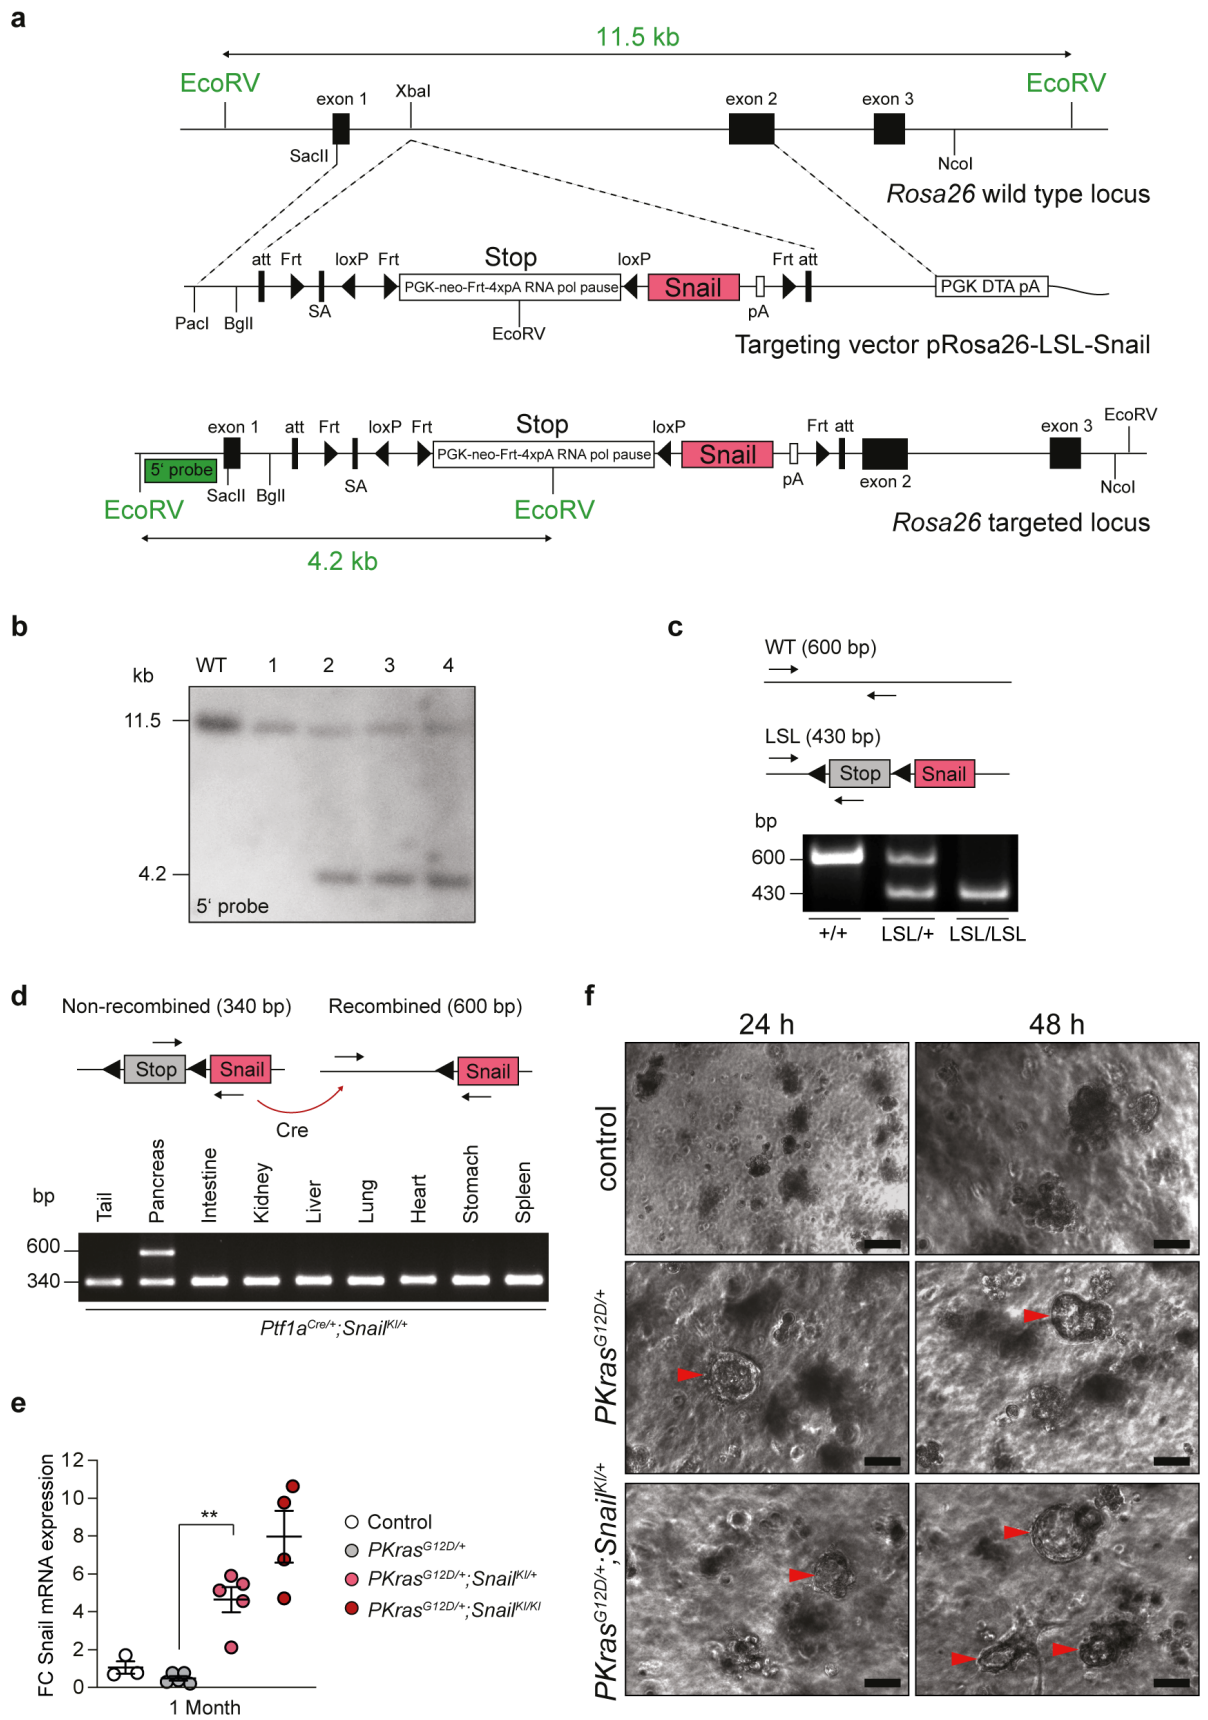

**Supplementary Figure S1. Generation of a Cre-activatable Snail expression model.**

**(a)** *Rosa26* targeting. From top to bottom, diagrams of: *Rosa26* wild-type locus; the *Rosa26* targeting vector with the lox-stop-lox (LSL) silenced *Snail* expression cassette; the targeted *Rosa26* locus. Restriction sites, location of the 5' probe, the exon structure of the *Rosa26* locus and sizes of DNA fragments are indicated. pA, polyadenylation sites; att, Gateway cloning sites; Frt, Frt recombination sites. **(b)** Southern blot analysis of DNA from wild type (WT, n=1) and targeted ES cells (1–4, n=16 in total) after EcoRV digestion. The expected band for the wild-type allele is 11.5 kb and for the targeted allele 4.2 kb. **(c)** Genotyping strategy. PCR analysis of DNA from wild-type (WT), heterozygous (LSL/+) and homozygous (LSL/LSL) *LSL-Rosa26<sup>Snail</sup>* knock-in mice with retained stop cassette (n=3 per genotype). Sizes of WT and mutant PCR products are indicated. **(d)** Upper panel: Strategy to activate *Snail* expression by Cre-mediated excision of the LSL cassette and to detect the non-recombined and recombined LSL cassette by genotyping PCR. Lower panel: PCR analysis of DNA extracted from indicated tissues of *Ptf1a<sup>Cre/+</sup>;LSL-R26<sup>Snail/+</sup>* knock-in mice (termed *Ptf1a<sup>Cre/+</sup>;Snail<sup>KI/+</sup>*) (n=3). Sizes of PCR products are indicated. **(e)** qRT-PCR analysis of *Snail* mRNA expression normalized to Cyclophilin A in pancreata of 1-month-old wild-type control (n=3), *Ptf1a<sup>Cre/+</sup>;LSL-Kras<sup>G12D/+</sup>* (*PKras<sup>G12D/+</sup>*, n=5), *Ptf1a<sup>Cre/+</sup>;LSL-Kras<sup>G12D/+</sup>;LSL-R26<sup>Snail/+</sup>* (*PKras<sup>G12D/+</sup>;Snail<sup>KI/+</sup>*, n=6) and *Ptf1a<sup>Cre/+</sup>;LSL-Kras<sup>G12D/+</sup>;LSL-R26<sup>Snail/Snail</sup>* (*PKras<sup>G12D/+</sup>;Snail<sup>KI/KI</sup>*, n=4) mice; mean  $\pm$ SEM, \*\*p=0.0029, unpaired two-tailed *t*-test with Welch's correction). Note: One outlier in the *PKras<sup>G12D/+</sup>;Snail<sup>KI/+</sup>* cohort that differed significantly from the other observations, has been removed from the analysis (see panel S1e of Source Data file for outlier definition). FC, fold change. **(f)** Representative photomicrographs of ductal structures of the indicated genotypes formed in acinar explants cultured for 24h and 48h in a collagen layer (n=4 explants per genotype). Red arrowheads indicate ductal structures. Scale bars, 50 $\mu$ m. Source data of Supplementary Figure S1 are provided in the Source Data file.

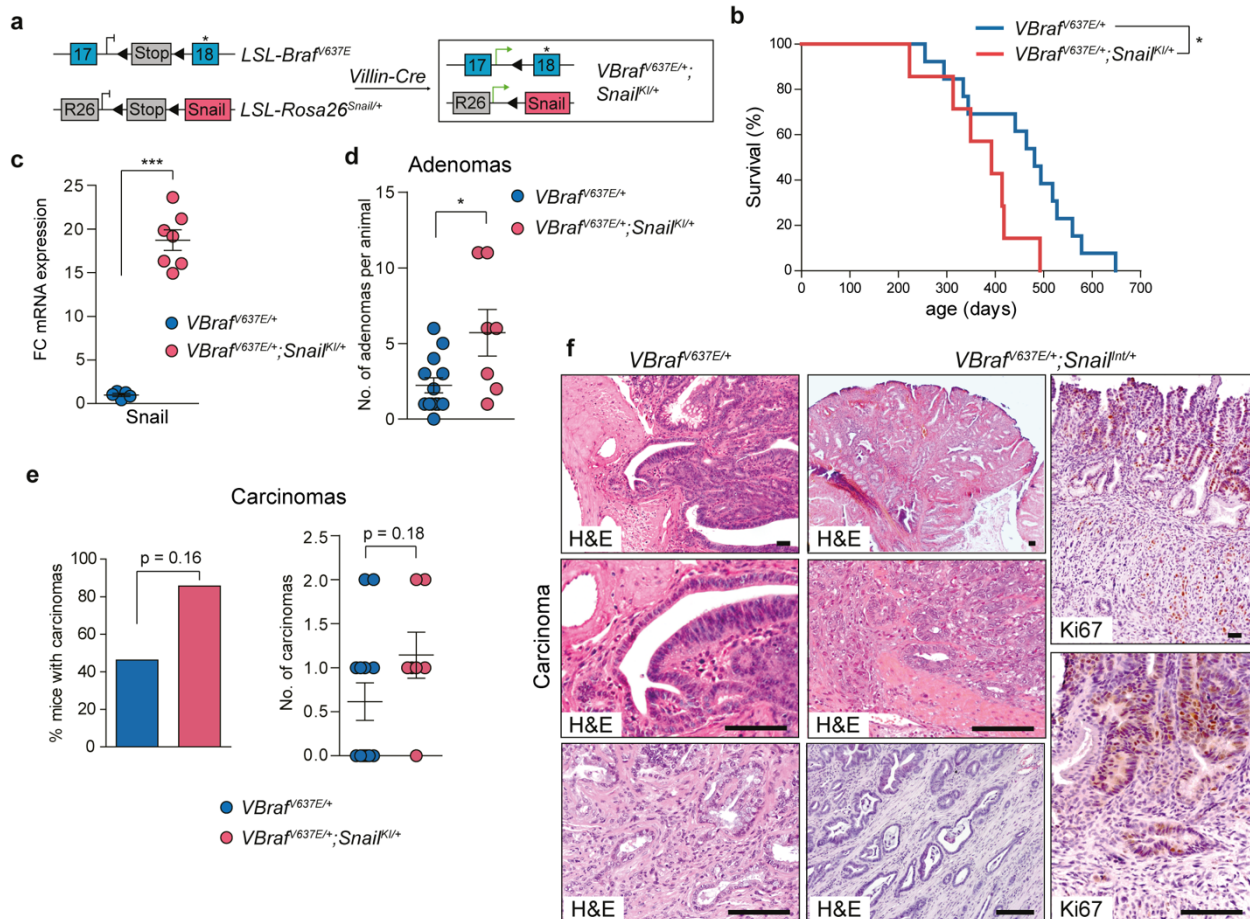

**Supplementary Figure S2.** Aberrant SNAIL expression promotes BRAF<sup>V637E</sup>-driven intestinal cancer progression.

**(a)** Strategy to aberrantly express Snail in intestinal epithelium in the *Villin-Cre*;*LSL-Braf*<sup>V637E/+</sup> model (termed *VBraf*<sup>V637E/+</sup>) of serrated intestinal cancer. **(b)** Kaplan-Meier survival curves of *VBraf*<sup>V637E/+</sup> (n=13, median survival 481 days) and *VBraf*<sup>V637E/+</sup>;*Snail*<sup>KI/+</sup> (n=7, median survival 392 days) mice. \*p=0.0321, log-rank test. **(c)** qRT-PCR analysis of Snail mRNA expression normalized to Cyclophilin A in the intestine of *VBraf*<sup>V637E/+</sup> (n=5) and *VBraf*<sup>V637E/+</sup>;*Snail*<sup>KI/+</sup> endpoint mice (n=7). Mean ± SEM, \*\*p<0.0001, unpaired two-tailed *t*-test with Welch's correction; FC, fold change. **(d)** Number of adenomas in the intestine of *VBraf*<sup>V637E/+</sup> (n=13) and *VBraf*<sup>V637E/+</sup>;*Snail*<sup>KI/+</sup> (n=7) endpoint mice. Mean ± SEM, \*p=0.0368, Mann-Whitney two-tailed test. **(e)** Percentage of carcinoma-bearing mice (left panel) and number of carcinomas (right panel) in the intestine of *VBraf*<sup>V637E/+</sup> (n=13) and *VBraf*<sup>V637E/+</sup>;*Snail*<sup>KI/+</sup> (n=7) endpoint mice. Left panel by two-tailed Fisher's exact test; right panel by Mann-Whitney two-tailed test; p-values are indicated (not significant); mean ± SEM. **(f)** Representative H&E and Ki67 staining of intestinal carcinoma in *vBraf*<sup>V637E/+</sup> (n=6) and *VBraf*<sup>V637E/+</sup>;*Snail*<sup>KI/+</sup> (n=6) mice. Scale bars, 50 μm. Source data of Supplementary Figure S2 are provided in the Source Data file.

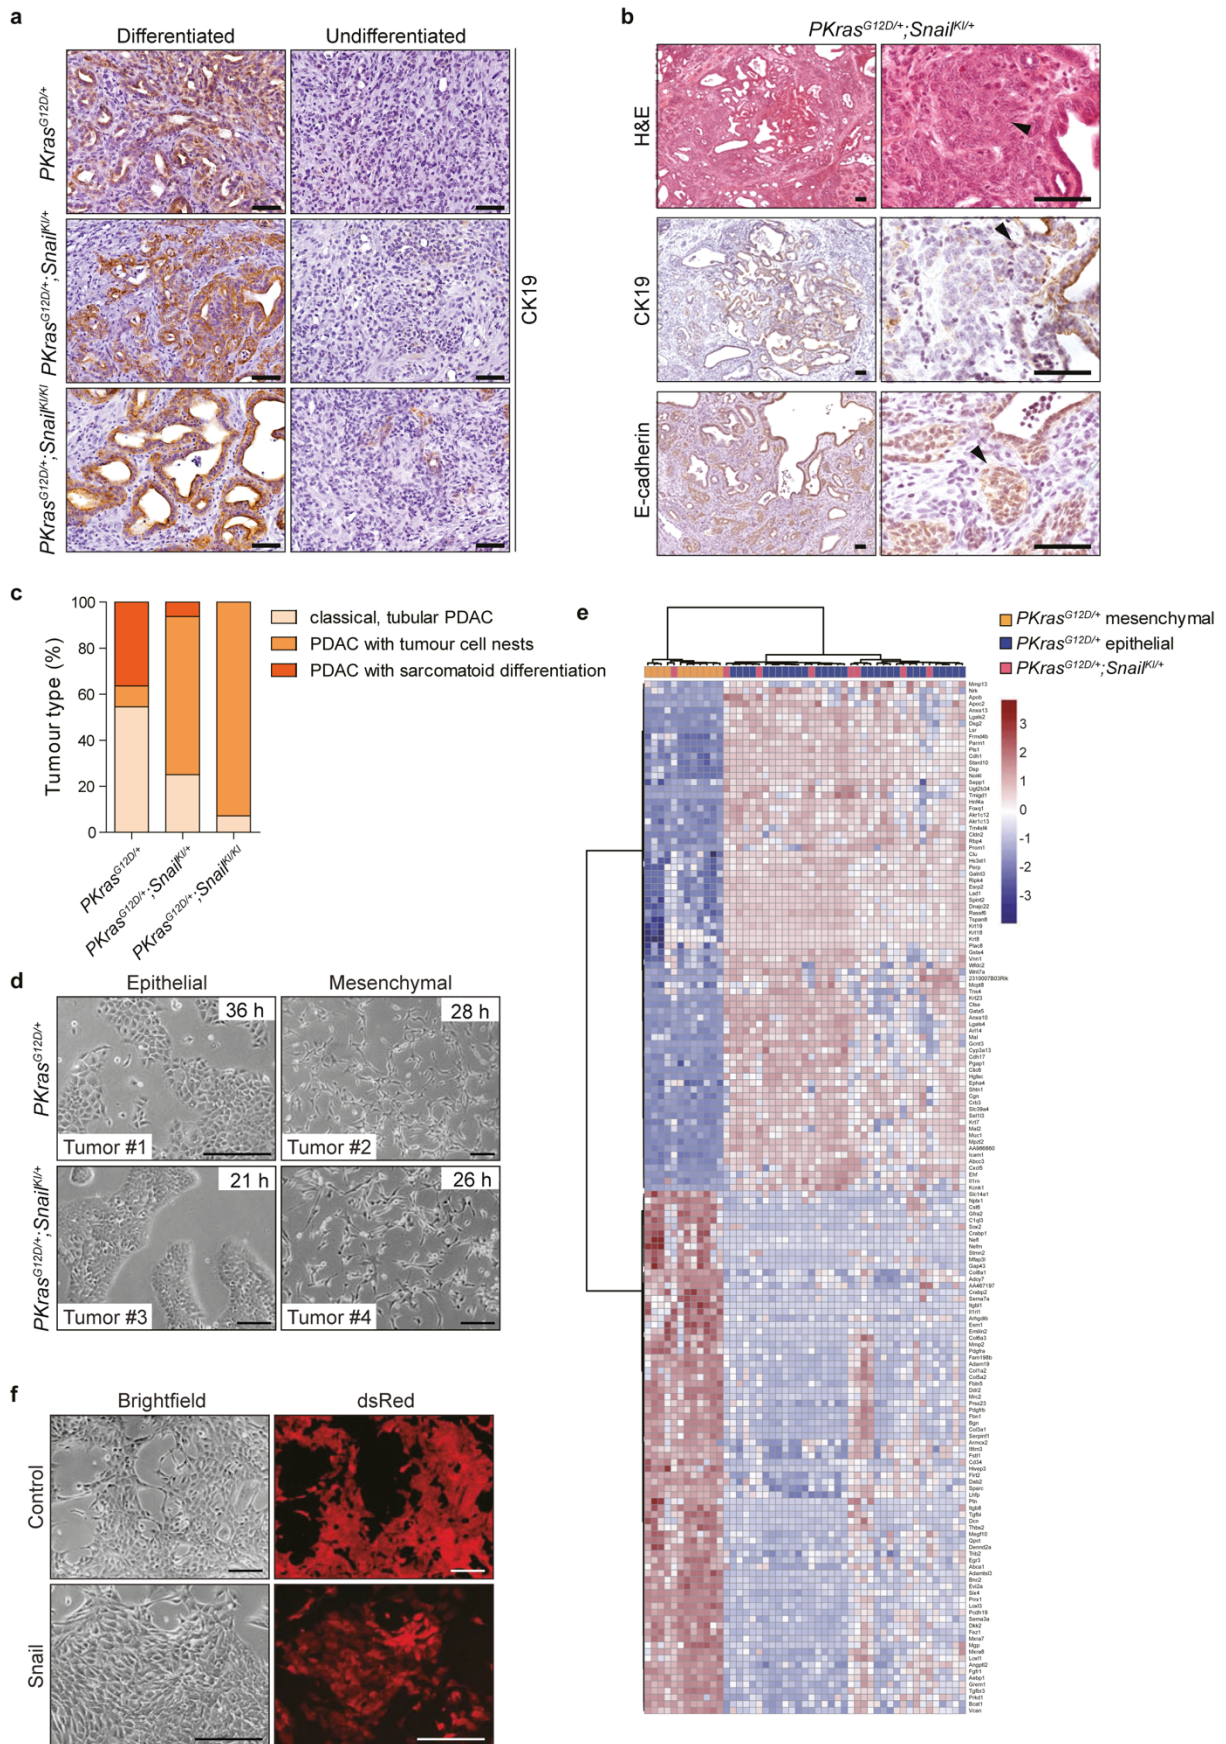

**Supplementary Figure S3.** Aberrant SNAIL expression induces PDAC with epithelial and mesenchymal differentiation.

**(a)** Representative images of CK19-stained PDAC sections of endpoint mice with indicated genotypes (n=6 per genotype). Note the presence of differentiated and undifferentiated tumours in all genotypes. Scale bars, 50  $\mu$ m. **(b)** Representative H&E, CK19 and E-cadherin staining of PDAC sections of *PKras*<sup>G12D/+</sup>;*Snail*<sup>KI/+</sup> mice (n=3). Black arrowheads indicate areas of tumour cells with solid nested growth. Scale bars, 50  $\mu$ m. **(c)** Percentage of tumours with classical tubular PDAC, sarcomatoid differentiation and solid nested tumour cell growth in *PKras*<sup>G12D/+</sup> (n=11), *PKras*<sup>G12D/+</sup>;*snail*<sup>KI/+</sup> (n=16) and *PKras*<sup>G12D/+</sup>;*Snail*<sup>KI/KI</sup> mice (n=14). **(d)** Representative brightfield images of 2D cultured primary murine *PKras*<sup>G12D/+</sup>;*Snail*<sup>KI/+</sup> (n=3) and *PKras*<sup>G12D/+</sup>;*Snail*<sup>KI/+</sup> (n=3) PDAC cells with an epithelial (left) and mesenchymal (right) morphology. The cell doubling time in hours (h) is indicated in the upper right corner. Scale bars, 50  $\mu$ m. **(e)** Heatmap showing the most significant >2-fold differentially regulated genes between mesenchymal and epithelial PDAC cell lines derived from primary tumours, circulating tumor cells in the blood and metastases from the *PKras*<sup>G12D/+</sup> model with and without *Trp53* mutation (n=41). Hierarchical clustering was performed including *PKras*<sup>G12D/+</sup>;*Snail*<sup>KI</sup> cell lines (n=8) with and without *Trp53* mutation, which are depicted in red. Mesenchymal *PKras*<sup>G12D/+</sup> cell lines with and without *Trp53* mutation are indicated in yellow, epithelial *PKras*<sup>G12D/+</sup> cell lines with and without *Trp53* mutation are depicted in blue. The colour code (top right) shows the standardized gene expression value (z-score). **(f)** Representative brightfield and fluorescent images of epithelial PDAC cells transduced with a retroviral *Snail*/dsRed expression vector (RCAS-TVA system) show epithelial morphology (n=3 per condition). Scale bars, 50  $\mu$ m. dsRed fluorescence indicates successful retroviral transduction. Source data of Supplementary Figure S3 are provided in the Source Data file.

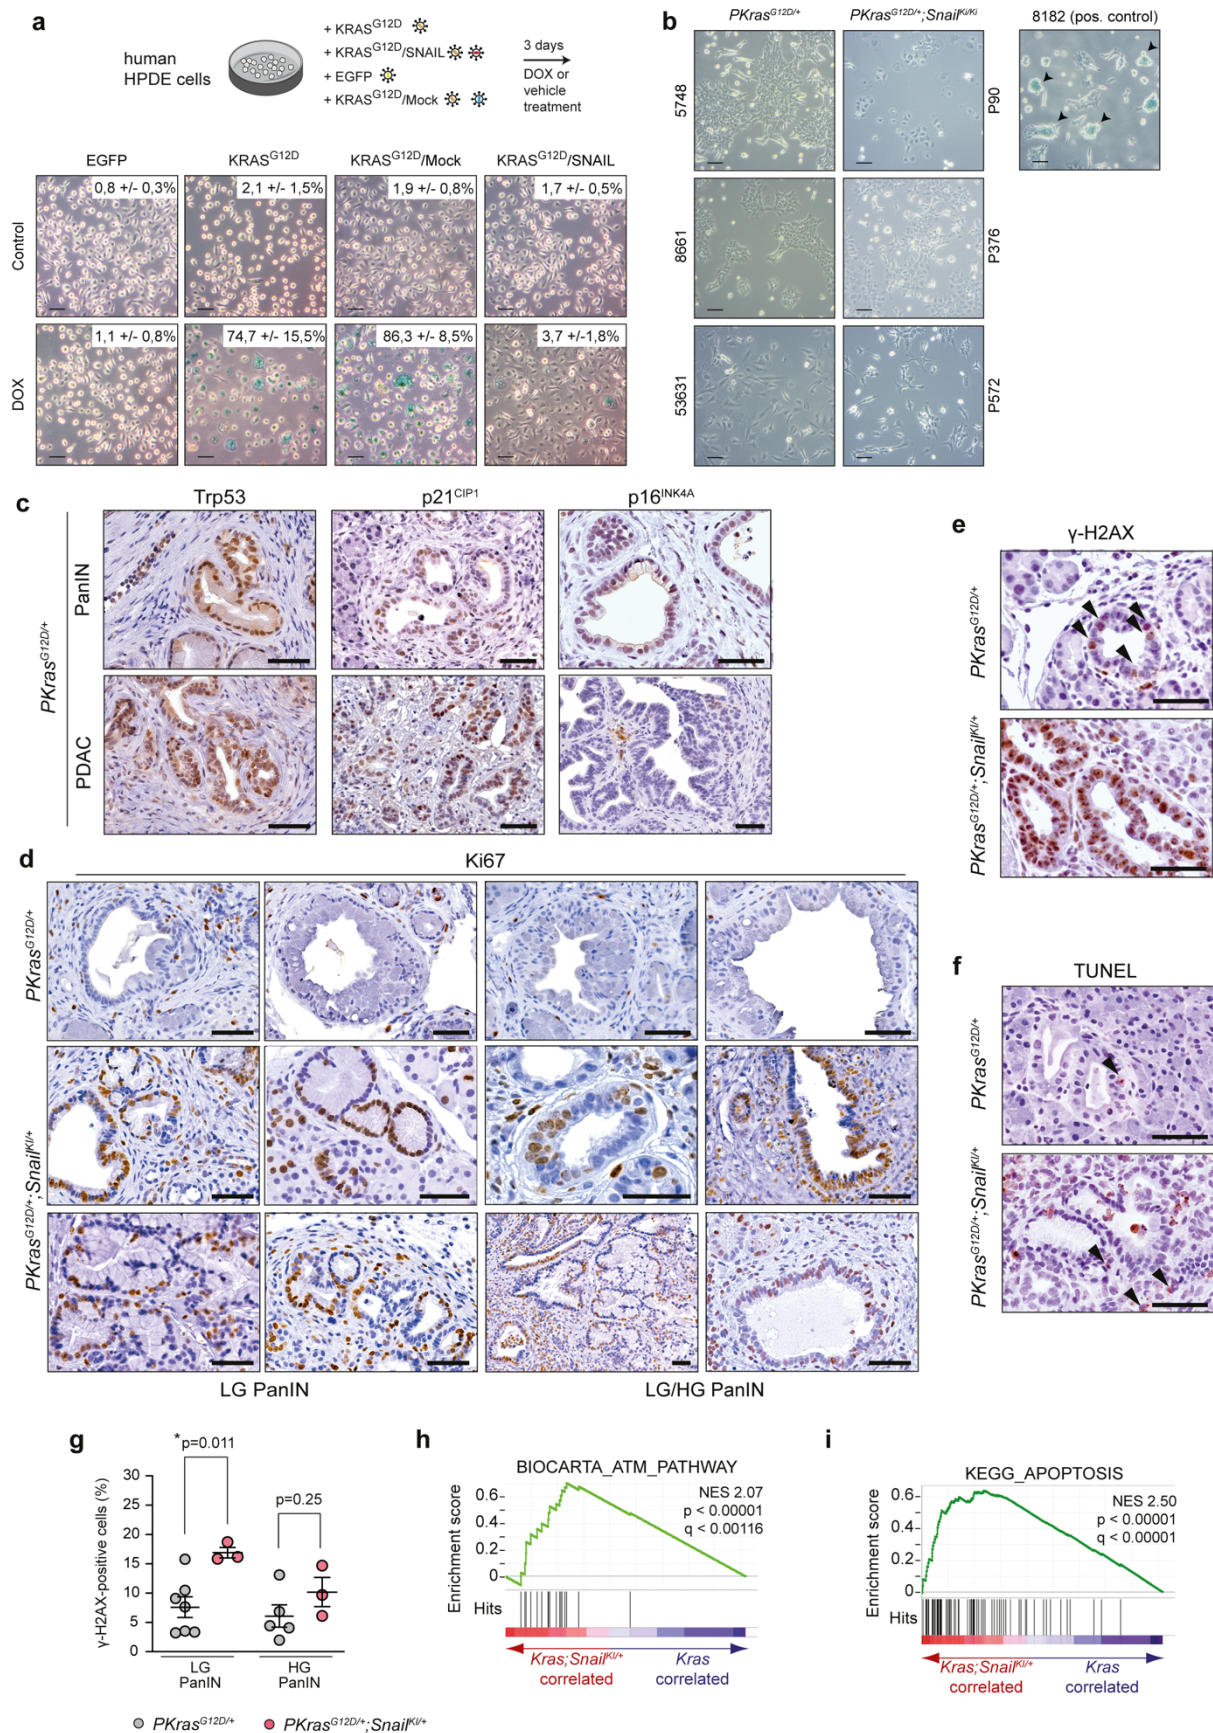

**Supplementary Figure S4.** SNAIL bypasses oncogenic Kras-induced senescence and increases DNA damage and apoptosis in PanIN lesions.

(a) Scheme of the strategy utilized for the doxycycline-regulated activation of EGFP, *KRAS*<sup>G12D</sup> or *KRAS*<sup>G12D</sup>+*SNAIL* in Human Pancreatic Duct Epithelial (HPDE) cells (upper panel). HPDE cells were transduced with lentiviral constructs and treated with doxycycline for 3 days. Lower panel: Representative images of SA-β-Gal stained HPDE cells after doxycycline-induced (100 ng ml<sup>-1</sup>) activation of GFP, *KRAS*<sup>G12D</sup> (+mock). n=3 independent experiments. The percentage of SA-β-gal<sup>+</sup> cells is indicated in the upper right corner. Scale bars, 10µm. (b) Representative images of SA-β-Gal staining of primary low-passaged PDAC cell lines from *PKras*<sup>G12D/+</sup> (n=3) and *PKras*<sup>G12D/+</sup>;*Snail*<sup>KI/KI</sup> (n=3) mice. LacZ<sup>+</sup> PDAC cells were used as positive control (n=1). Scale bars, 20µm. (c) Immunohistochemical Trp53, p21<sup>CIP1</sup> and p16<sup>INK4A</sup> stainings of PanINs and PDAC of *PKras*<sup>G12D/+</sup> animals (n=3 each). Please note that depending on the route of tumour evolution the tumour suppressor genes Trp53, p21<sup>CIP1</sup> and p16<sup>INK4A</sup> are lost or stay intact<sup>32</sup>. Therefore, the presented images are not representative for all *PKras*<sup>G12D/+</sup> tumours, which show diverse routes of tumour evolution<sup>32</sup>. (d) Representative images of Ki67 staining of PanIN lesions of *PKras*<sup>G12D</sup> (n=6) and *PKras*<sup>G12D/+</sup>;*Snail*<sup>KI/+</sup> (n=8) mice. Scale bars, 50µm. (e) Immunohistochemical γ-H2AX staining of PanIN lesions of *PKras*<sup>G12D</sup> (n=7) and *PKras*<sup>G12D/+</sup>;*Snail*<sup>KI/+</sup> (n=3) mice. Scale bars, 50µm. (f) TUNEL staining of PanIN lesions of *PKras*<sup>G12D</sup> (n=7) and *PKras*<sup>G12D/+</sup>;*Snail*<sup>KI/+</sup> (n=3) mice. Scale bars, 50µm. (g) Percentage of γ-H2AX positive cells in PanIN lesions of *PKras*<sup>G12D/+</sup>;*Snail*<sup>KI/+</sup> (n=3) and *PKras*<sup>G12D/+</sup> (n=7) mice. Mean ±SD, \*p=0.0113, unpaired two-tailed *t*-test. (h, i) Gene-set enrichment analysis (GSEA) using mRNA expression profiles of *PKras*<sup>G12D/+</sup>;*Snail*<sup>KI/+</sup> (red) and *PKras*<sup>G12D/+</sup> (blue) pancreata of 1-month-old mice (n=2 per genotype) computed and corrected for multiple testing using the Benjamini–Hochberg procedure (for statistical details, see methods section) showing significant enrichment of Biocarta ATM pathway (Normalized Enrichment Score: 2.07; Nominal p-value:<0.00001; False Discovery Rate (FDR) q-value:<0.00116) (h) and KEGG Apoptosis (Normalized Enrichment Score: 2.5; Nominal p-value:<0.00001; False Discovery Rate (FDR) q-value:<0.00001) genes (i).

LG, low grade; HG, high grade. Source data of Supplementary Figure S4 are provided in the Source Data file.



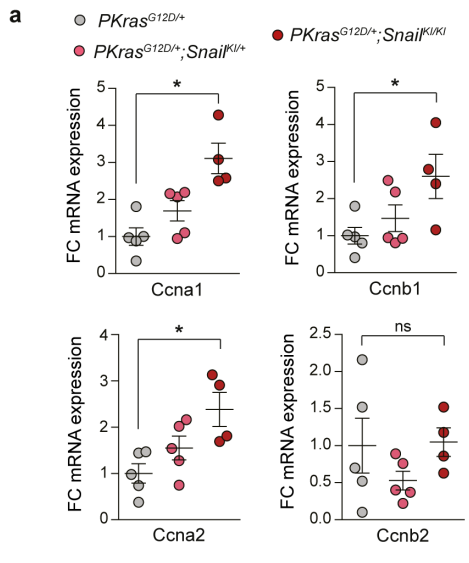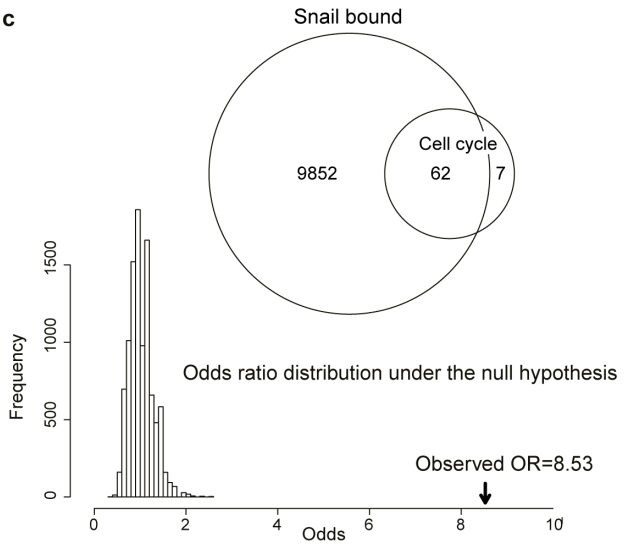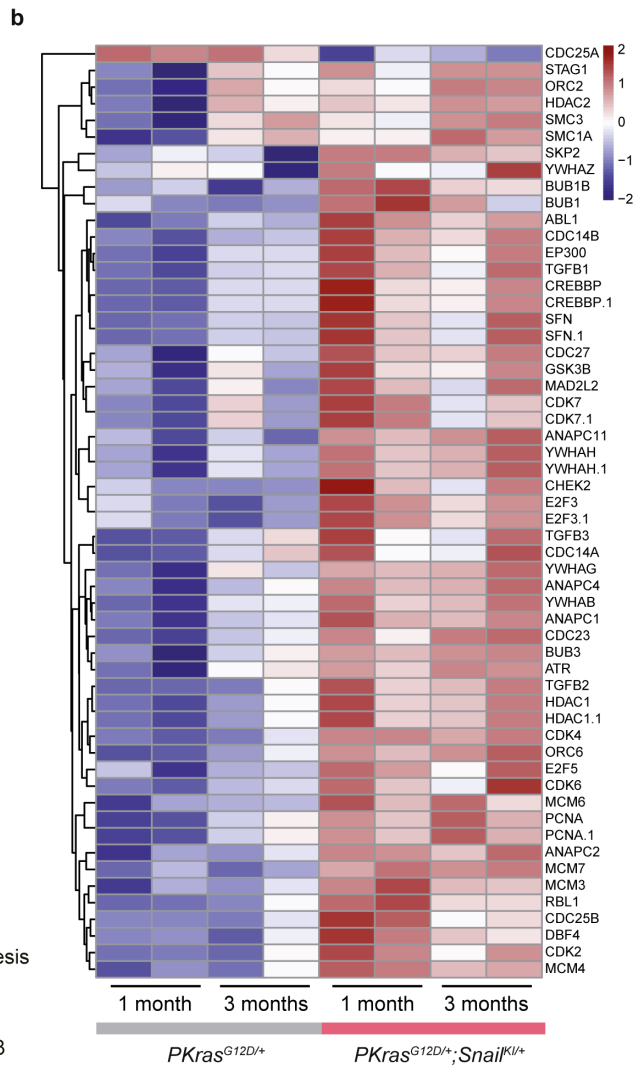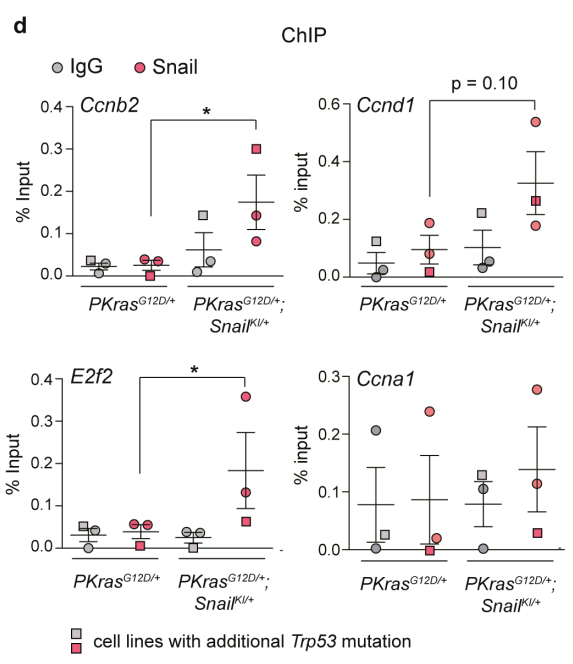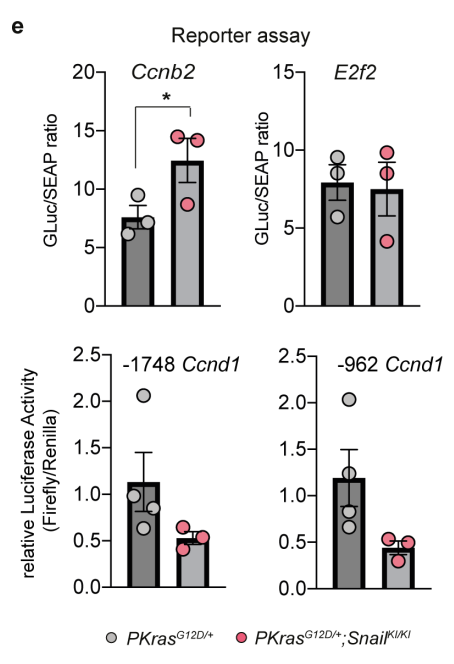

**Supplementary Figure S5.** SNAIL directly binds to E-boxes of cell cycle regulators to increase their expression.

**(a)** qRT-PCR of mRNA expression of the indicated cyclins normalized to Cyclophilin A from pancreatic tissue of 1-month-old *PKras*<sup>G12D/+</sup> (n=5), *PKras*<sup>G12D/+</sup>;*Snail*<sup>KI/+</sup> (n=5) and *PKras*<sup>G12D/+</sup>;*Snail*<sup>KI/KI</sup> mice (n=4). Mean  $\pm$ SEM, ns, not significant, \*p=0.0159 (*Ccna1* and *Ccna2*), \*p=0.0317 (*Ccnb1*), p=0.7778 (*Ccnb2*), Mann-Whitney two-tailed test. FC, fold change. **(b)** Heatmap showing significantly regulated genes computed and corrected for multiple testing using the Benjamini–Hochberg procedure (for statistical details, please see methods section) involved in cell cycle regulation of *PKras*<sup>G12D/+</sup> (n=4) versus *PKras*<sup>G12D/+</sup>;*Snail*<sup>KI/+</sup> (n=4) pancreata (p-value <0.05 and q-value <0.05) from KEGG\_CELL\_CYCLE gene set. Colour represents standardized gene expression value (z-score). **(c)** Upper panel: Venn diagram showing overlap of (1) significantly enriched KEGG cell cycle genes in pancreas of 1-month-old *PKras*<sup>G12D/+</sup>;*Snail*<sup>KI/+</sup> mice (n=2) computed and corrected for multiple testing using the Benjamini–Hochberg procedure (for statistical details, please see methods section) and (2) SNAIL-bound genes discovered by genome wide SNAIL-binding assay (ChIP-seq) in a previous study<sup>11</sup>. SNAIL-bound genes are defined as genes bearing a sequence bound by SNAIL within  $\pm$  1kb from the transcription start site. Lower panel: odds ratio (OR) of annotating the significantly enriched KEGG cell cycle genes to SNAIL-bound genes is significantly greater compared to that was calculated by replacing SNAIL-bound genes with randomly selected 9914 genes, non-parametric two-tailed Permutation test, p<0.001. **(d)** Chromatin immunoprecipitation (ChIP) of SNAIL binding to E-boxes of indicated promoters in *PKras*<sup>G12D/+</sup> (n=3) and *PKras*<sup>G12D/+</sup>;*Snail*<sup>KI/+</sup> (n=3) PDAC cell lines  $\pm$  *Trp53* mutation as indicated. %input calculation; IgG, negative control. Mean  $\pm$ SEM. \*p=0.05, Mann-Whitney one-tailed test. Note: Depicted genes including those shown in Fig. 7g (*Ccnb1*, *Ccnb2*, *Ccnd1*, *E2f2* and *E2f3*) are present in the SNAIL-bound fraction of cell cycle genes of the ChIP-seq data of panel (c). **(e)** *Ccnb2*, *Ccnd1* (-1748 and -962 site) and *E2f2* promoter activity in PDAC cells from *PKras*<sup>G12D/+</sup> (n=3) and *PKras*<sup>G12D/+</sup>;*Snail*<sup>KI/KI</sup> (n=3) mice (three independent experiments). Mean  $\pm$ SEM, \*p=0.0423, unpaired one-tailed Student's *t*-test. Source data of Supplementary Figure S5 are provided in the Source Data file.

**a**

## CRISPR/Cas9 negative selection (viability) screen

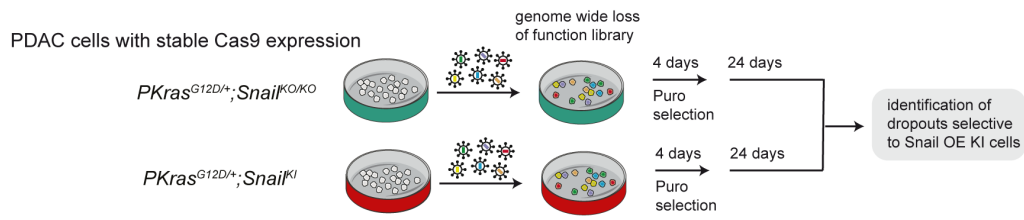**b**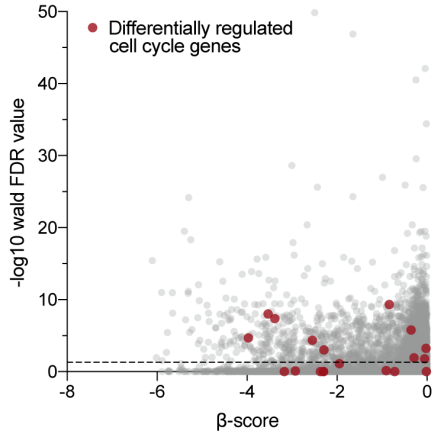**c**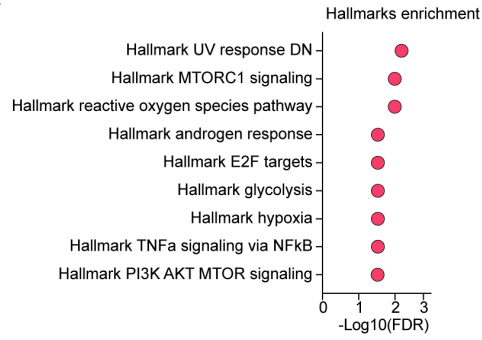**d**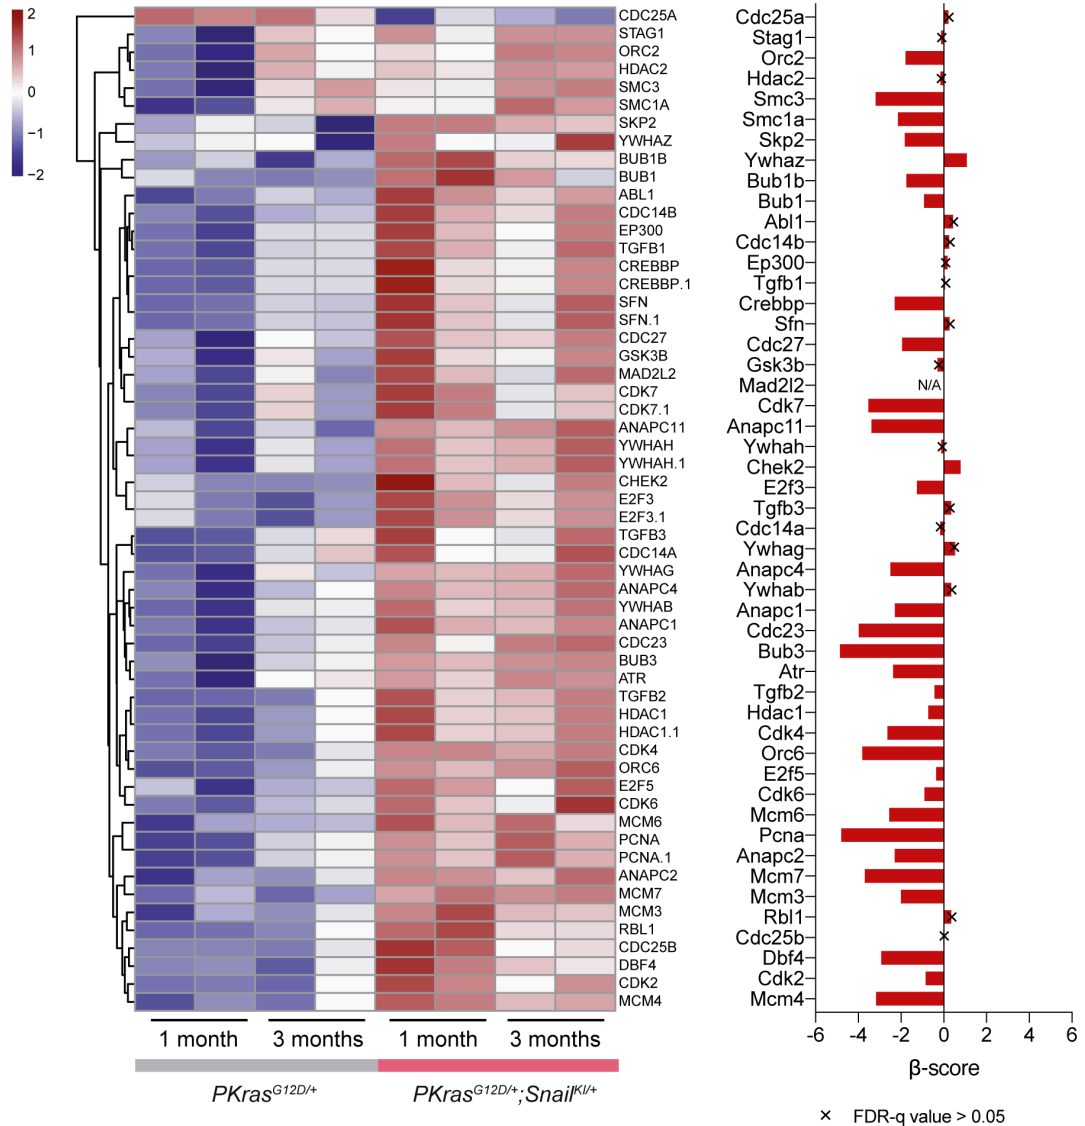

**Supplementary Figure S6.** Genome-wide CRISPR negative selection screens identify selective dependencies of Snail-driven PDAC cells on specific cell cycle regulators.

**(a)** Schematic representation of the genome-wide CRISPR/Cas9 negative selection screen as shown in Fig. 7j. **(b)** Volcano plot representing the negative  $\beta$ -scores of the CRISPR screen performed in PDAC cells from *PKras*<sup>G12D/+</sup>;*Snail*<sup>KO/KO</sup>, *PKras*<sup>G12D/+</sup>;*Snail*<sup>KI/+</sup>, *PKras*<sup>G12D/+</sup>;*Snail*<sup>KI/KI</sup> mice (n=4). Red dots denote differentially hit genes involved in cell cycle. **(c)** Enrichment analysis using the Hallmarks gene-set on the MSigDB portal. Only genes with an FDR  $\leq$  0.05 and a difference in  $\beta$  score (*Snail*<sup>Ki</sup> overexpression (OE) - *Snail*<sup>KO</sup> knock-out (KO) cells)  $<$  -1 were used for the analysis. **(d)** Integration of gene expression heatmap of Supplementary Fig. S5b showing significantly regulated cell cycle related genes of *PKras*<sup>G12D/+</sup> and *PKras*<sup>G12D/+</sup>;*Snail*<sup>KI/+</sup> mice (p-value  $<$  0.05 and q-value  $<$  0.05) from KEGG\_CELL\_CYCLE gene set (left panel; for statistical details, please see methods section) and  $\beta$ -scores of PDAC cell lines from the genome-wide CRISPR/Cas9 negative selection screen, calculated with the MAGeCK pipeline (right panel; for statistical details, please see methods section). Colour in the heatmap (left panel) represents standardized gene expression value (z-score). Genes of the right panel showing an FDR-q value  $>$ 0.05 are marked with a X on the bar.
