# Supplementary material for: Non-canonical functions of SNAIL drive context-specific cancer progression
Source: PubMed Central journal article supplement (PMC9992512; doi:10.1038/s41467-023-36505-0), 2023-03-07
Supplement: 41467_2023_36505_MOESM2_ESM.pdf [file 41467_2023_36505_MOESM2_ESM.pdf]

## **Description of Additional Supplementary Files**

File Name: Supplementary Data 1

Description: List of proteins identified by CHIP-MS

File Name: Supplementary Data 2

Description: List of genes of genome wide CRISPR/Cas9 negative selection screen
